# Supplementary material
Source: PubMed Central journal article supplement (PMC5830371)
Supplement: 2017_183749-Disclosures_and_Contributions.pdf [file 2017_183749-Disclosures_and_Contributions.pdf]

Haematologica  
HAEMATOL/2017/183749  
Version 4

Venetoclax induced a complete response in a patient with AL  
amyloidosis plateaued on CyBorD

Nelson Leung, Stephan D Thomé, and Angela Dispenzieri

Disclosures: Angela Dispenzieri is supported by Celgene, Prothena, Takeda, Alnylam, Pfizer for clinical trials. Nelson Leung is an advisor for Prothena.

Contributions: NL performed the research, data analysis and wrote the manuscript. ST performed research AD performed data analysis
